# Supplementary material
Source: publisher figshare collection journal article supplement (https://acs.figshare.com/ndownloader/files/3755977)
Supplement: Supplementary file 1 [file 3755977]

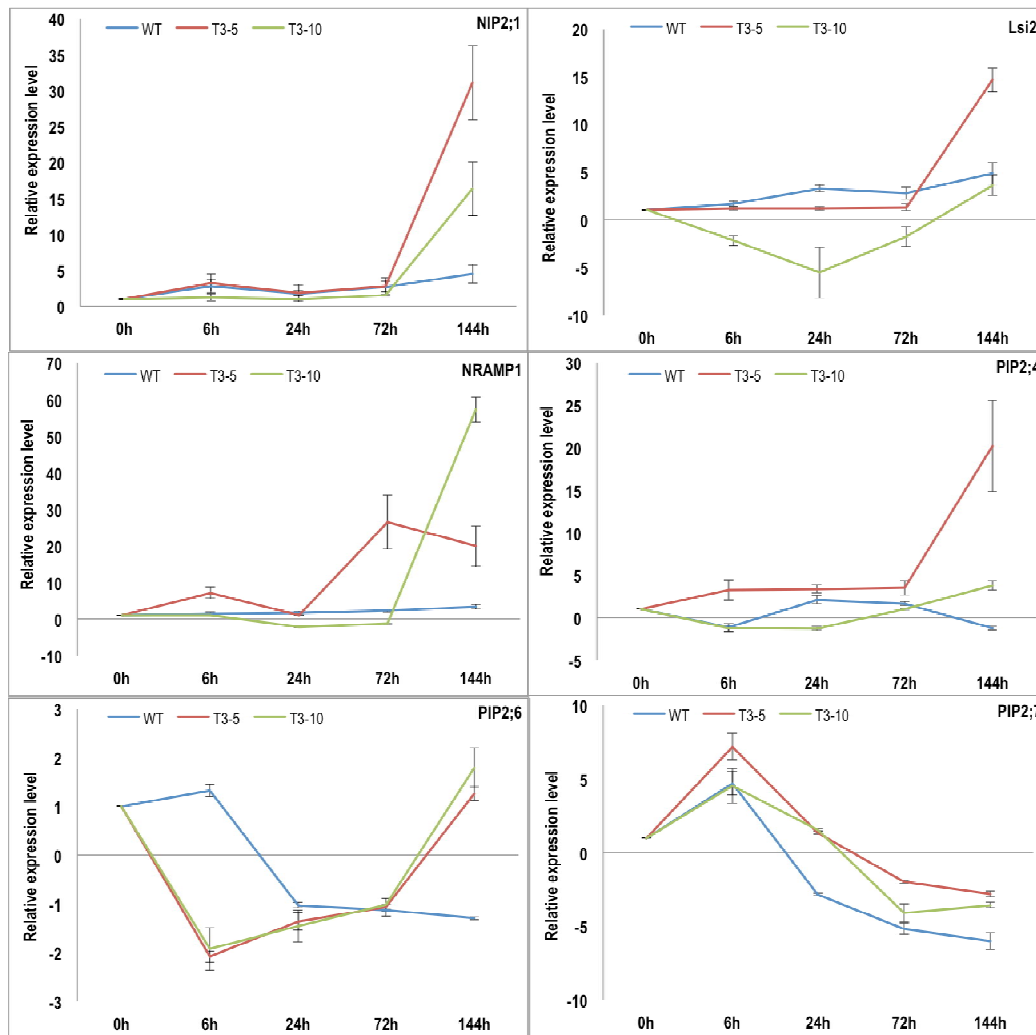

**Supplementary Figure 3. Expression profiles of genes functioning in arsenite uptake, translocation, and tolerance in the leaves of WT and *Ubi::MIR528* plants.**

Plants were grown in half-strength Kimura solution and treated with 25  $\mu$ M arsenite for 6, 24, 72, and 144 hours, respectively. Relative quantification of expression level of tested functional genes was conducted using real-time

RT-PCR. Expression level was normalized to that of  $\beta$ -tubulin. Fold changes in the expression level were estimated by the  $2^{-\Delta\Delta CT}$  method relative to levels in the leaves of WT and *Ubi::MIR528* samples without As(III) treatment (0 hour), respectively. Results are the mean  $\pm$  SE for three biological replicates. Four out of 6 tested genes (*NRAMP1*, *PIP2;6*, *PIP2;4*, and *PIP2;7*) were reported to be involved in As tolerance, while *NIP2;1* and *Lsi2* were As(III) uptake, translocation, and accumulation related in rice.
